# Supplementary material for: Integrated treatment of hepatitis C virus infection among people who inject drugs: A multicenter randomized controlled trial (INTRO-HCV)
Source: PLOS journal article supplement (doi:10.1371/journal.pmed.1003653), 2021-06-01
Supplement: S2 (10.1371/journal.pmed.1003653.s002) [file journal.pmed.1003653.s002]

**Supporting information file** for *Integrated Treatment of Hepatitis C Virus Infection Among People Who Inject Drugs: A Multi-Center Randomized Controlled Trial (INTRO-HCV)*

**S1 Table:** Testing of proportional-hazards assumption in Cox regression for effect of integrated vs standard treatment with Schoenfeld residuals p-values (SRp) and sensitivity analyses with split time for treatment initiation with intention-to-treat (ITT) and per protocol (PP) analyses.

|     |                |                                  |
|-----|----------------|----------------------------------|
| ITT | Time 0-2m      | 1.4 (1.0-2.1, SRp=0.6583)        |
| ITT | Time 2-6m      | 3.5 (2.4-5.1, SRp=0.3230)        |
| ITT | Time 6-12m     | 2.2 (1.0-4.8, SRp=0.2039)        |
| ITT | <b>Overall</b> | <b>2.2 (1.7-2.9, SRp=0.0681)</b> |
|     |                |                                  |
| PP  | Time 0-2m      | 1.2 (0.8-1.8, SRp=0.6037)        |
| PP  | Time 2-6m      | 3.0 (2.0-4.4, SRp=0.2231)        |
| PP  | Time 6-12m     | 2.3 (1.0-5.2, SRp=0.3231)        |
| PP  | <b>Overall</b> | <b>1.9 (1.5-2.5, SRp=0.0433)</b> |
